# Supplementary material for: Ability of clinical data to predict readmission in Child and Adolescent Mental Health Services
Source: PeerJ Comput Sci. 2024 Oct 18;10:e2367. doi: 10.7717/peerj-cs.2367 (PMC11622991; doi:10.7717/peerj-cs.2367)
Supplement: Supplemental Information 19 [file peerj-cs-10-2367-s019.xlsx]

## Sheet: Table S1
		ICD-10 and ATC										Test Phecode		Test ATC4
		without		with 20 most freq		with 50 most freq		with 100 most freq		with All (1444 columns)		with 20 most freq		with 20 most freq
		Accuracy	F1-Score	Accuracy	F1-Score	Accuracy	F1-Score	Accuracy	F1-Score	Accuracy	F1-Score	Accuracy	F1-Score	Accuracy	F1-Score
BL	DT	0.54	0.76	0.54	0.76	0.54	0.76	0.55	0.77	0.55	0.76	0.54	0.76	0.54	0.76
BL	LR	0.63	0.66	0.63	0.65	0.62	0.65	0.62	0.65	0.62	0.65	0.62	0.65	0.63	0.65
BL	RF	0.51	0.78	0.51	0.78	0.51	0.78	0.51	0.78	0.51	0.78	0.50	0.78	0.51	0.78
BL	GB	0.50	0.78	0.50	0.78	0.50	0.78	0.50	0.78	0.50	0.78	0.50	0.78	0.50	0.78
BL	XG	0.59	0.74	0.60	0.73	0.61	0.73	0.61	0.72	0.62	0.71	0.60	0.73	0.60	0.73
BL	MP	0.51	0.78	0.52	0.78	0.53	0.78	0.53	0.80	0.53	0.79	0.53	0.78	0.52	0.78
ML	DT	0.25	0.23	0.23	0.23	0.22	0.26	0.23	0.24	0.23	0.27	0.22	0.23	0.23	0.23
ML	LR	0.30	0.28	0.29	0.26	0.28	0.28	0.28	0.29	0.28	0.25	0.29	0.26	0.29	0.26
ML	RF	0.27	0.33	0.27	0.28	0.28	0.31	0.28	0.31	0.28	0.28	0.28	0.30	0.27	0.28
ML	GB	0.28	0.28	0.28	0.26	0.28	0.25	0.28	0.26	0.29	0.26	0.28	0.26	0.28	0.26
ML	XG	0.26	0.26	0.26	0.28	0.27	0.27	0.27	0.28	0.27	0.26	0.26	0.29	0.26	0.28
ML	MP	0.25	0.28	0.25	0.23	0.25	0.22	0.26	0.24	0.25	0.20	0.26	0.28	0.25	0.23
