# Supplementary material for: Ability of clinical data to predict readmission in Child and Adolescent Mental Health Services
Source: PeerJ Comput Sci. 2024 Oct 18;10:e2367. doi: 10.7717/peerj-cs.2367 (PMC11622991; doi:10.7717/peerj-cs.2367)
Supplement: Supplemental Information 20 [file peerj-cs-10-2367-s020.xlsx]

## Sheet: Table S2
Algorithm	Random Forest	Random Forest	Random Forest	Random Forest		Comparing the models
Imbalance technique	nan	Custom class weight	class_weight= 'balanced'	Oversampling
Type of classification	Binary	Binary	Binary	Binary		Criteria	GradientBoosting
Mean CV Accuracy	0.5075	0.525205	0.507883	0.966351			Oversampling
Mean CV F1-Score	0.7847	0.155358	0.784886	0.966329		AUC	0.7005
Test Accuracy	0.5122	0.516388	0.509380	0.532526		Test F1-score	0.592954
Test F1-Score	0.7844	0.104462	0.782103	0.791585		Recall - class 0	0.49
class	0	0	0	0		Recall - class 1	0.79
precision	0.85	0.97	0.85	0.86		Mean CV Accuracy	0.667564
recall	0.99	0.18	0.99	0.96		Test Accurcay	0.636492
f1-score	0.92	0.30	0.91	0.91		better than others	2
support	3841	3841	3841	3841
class	1	1	1	1
precision	0.41	0.16	0.32	0.34
recall	0.03	0.92	0.03	0.10
f1-score	0.06	0.28	0.06	0.16
support	695	695	695	695
Confusion Matrix (Test):	[[3808 33] [ 672 23]]	[[148, 3693], [4, 691]]	[[3797, 44], [674, 21]]	[[3704, 137], [625, 70]]
AUC	0.6707	0.6684	0.6797	0.6739
Algorithm	DecisionTreeClassifier	DecisionTreeClassifier	DecisionTreeClassifier	DecisionTreeClassifier
Imbalance technique	nan	Custom class weight	class_weight= 'balanced'	Oversampling
Type of classification	Binary	Binary	Binary	Binary
Mean CV Accuracy	0.5390	0.546576	0.544367	0.911999
Mean CV F1-Score	o.7598	0.764816	0.763405	0.911423
Test Accuracy	0.5364	0.547644	0.555071	0.557997
Test F1-Score	0.7580	0.761692	0.769264	0.762539
class	0	0	0	0
precision	0.86	0.86	0.86	0.86
recall	0.85	0.85	0.86	0.84
f1-score	0.86	0.86	0.86	0.85
support	3841	3841	3841	3841
class	1	1	1	1
precision	0.21	0.23	0.25	0.24
recall	0.22	0.24	0.25	0.27
f1-score	0.22	0.24	0.25	0.25
support	695	695	695	695
Confusion Matrix (Test):	[[3281 560] [ 543 152]]	[[3273, 568], [526, 169]]	[[3319, 522], [524, 171]]	[[3242, 599], [506, 189]]
AUC	0.5369	0.5488	0.5547	0.5580
Algorithm	GradientBoosting	GradientBoosting	GradientBoosting	GradientBoosting
Imbalance technique	nan	Custom class weight	sample_weight: class_weight= 'balanced'	Oversampling
Type of classification	Binary	Binary	Binary	Binary
Mean CV Accuracy	0.5027	0.5027	0.5027	0.667564
Mean CV F1-Score	0.7821	0.7821	0.7821	0.666666
Test Accuracy	0.5038	0.5038	0.5038	0.636492
Test F1-Score	0.7792	0.7792	0.7792	0.592954
class	0	0	0	0
precision	0.85	0.85	0.85	0.93
recall	1	1	1	0.49
f1-score	0.92	0.92	0.92	0.64
support	3841	3841	3841	3841
class	1	1	1	1
precision	0.60	0.60	0.60	0.22
recall	0.01	0.01	0.01	0.79
F1-score	0.02	0.02	0.02	0.34
support	695	695	695	695
Confusion Matrix (Test):	[[3837 4] [ 689 6]]	[[3837 4] [ 689 6]]	[[3837 4] [ 689 6]]	[[1872, 1969], [149, 546]]
AUC	0.7093	0.7093	0.7093	0.7005
Algorithm	XGBClassifier	XGBClassifier	XGBClassifier	XGBClassifier
Imbalance technique	nan	Custom class weight	class_weight= 'balanced'	Oversampling
Type of classification	Binary	Binary	Binary	Binary
Mean CV Accuracy	0.5159	0.512599	0.5159	0.801447
Mean CV F1-Score	0.7892	0.787965	0.7892	0.800637
Test Accuracy	0.5166	0.518787	0.5166	0.551546
Test F1-Score	0.7867	0.789061	0.7867	0.550450
class	0	0	0	0
precision	0.85	0.85	0.85	0.88
recall	0.99	0.99	0.99	0.46
f1-score	0.91	0.92	0.91	0.60
support	3841	3841	3841	3841
class	1	1	1	1
precision	0.40	0.53	0.40	0.18
recall	0.05	0.04	0.05	0.65
f1-score	0.08	0.08	0.08	0.28
support	695	695	695	695
Confusion Matrix (Test):	[[3792 49] [ 663 32]]	[[3814, 27], [664, 31]]	[[3792 49] [ 663 32]]	[[1750, 2091], [245, 450]]
AUC	0.6827	0.6804	0.6827	0.5846
Algorithm	LogisticRegression	LogisticRegression	LogisticRegression	LogisticRegression
Imbalance technique	nan	Custom class weight	class_weight= 'balanced'	Oversampling
Type of classification	Binary	Binary	Binary	Binary
Mean CV Accuracy	0.5037	0.501548	0.627781	0.635408
Mean CV F1-Score	0.7827	0.781336	0.664378	0.634909
Test Accuracy	0.5031	0.501247	0.634057	0.631023
Test F1-Score	0.7784	0.777343	0.666039	0.621180
class	0	0	0	0
precision	0.85	0.85	0.91	0.92
recall	0.99	1.00	0.60	0.53
f1-score	0.92	0.92	0.72	0.67
support	3841	3841	3841	3841
class	1	1	1	1
precision	0.29	0.30	0.23	0.22
recall	0.01	0.00	0.67	0.73
F1-score	0.02	0.01	0.34	0.34
support	695	695	695	695
Confusion Matrix (Test):	[[3821 20] [ 687 8]]	[[3834, 7], [692, 3]]	[[2312, 1529], [232, 463]]	[[2040, 1801], [187, 508]]
AUC	0.6730	0.6728	0.6729	0.6725
Algorithm	MLPClassifier	MLPClassifier	MLPClassifier
Imbalance technique	nan	adoptive learning rate	Oversampling
Type of classification	Binary	Binary	Binary
Mean CV Accuracy	0.523933	0.523933	0.811443
Mean CV F1-Score	0.784734	0.784734	0.811079
Test Accuracy	0.537946	0.537946	0.560573
Test F1-Score	0.787956	0.787956	0.639586
class	0	0	0
precision	0.86	0.86	0.87
recall	0.94	0.94	0.59
f1-score	0.90	0.90	0.70
support	3841	3841	3841
class	1	1	1
precision	0.29	0.29	0.19
recall	0.14	0.14	0.53
f1-score	0.18	0.18	0.28
support	695	695	695
Confusion Matrix (Test):	[[3613 228] [ 601 94]]	[[3613, 228], [601, 94]]	[[2267, 1574], [326, 369]]
AUC	0.6188	0.6188	0.5908
