# Supplementary material for: Ability of clinical data to predict readmission in Child and Adolescent Mental Health Services
Source: PeerJ Comput Sci. 2024 Oct 18;10:e2367. doi: 10.7717/peerj-cs.2367 (PMC11622991; doi:10.7717/peerj-cs.2367)
Supplement: Supplemental Information 21 [file peerj-cs-10-2367-s021.xlsx]

## Sheet: Table S3
Algorithm	Random Forest	Random Forest	Random Forest		Comparing the models
Imbalance technique	nan	Weighted class	Oversampling
Type of classification	Multi	Multi	Multi		Criteria	Random Forest	Random Forest	GradientBoosting	GradientBoosting
Mean CV Accuracy	0.4284	0.4323	0.5545			Oversampling	Weighted class	nan	Oversampling
mean CV F1-Score	0.4292	0.4323	0.5498		AUC	0.6368	0.6321	0.6319	0.6306
Test Accuracy	0.4256	0.4529	0.4625		Test F1-Score	0.4552	0.4541	0.4478	0.4239
Test F1-Score	0.4255	0.4541	0.4552		Recall - class 0	0.46	0.33	0.29	0.47
class	0	0	0		Recall - class 1	0.38	0.46	0.44	0.22
precision	0.45	0.42	0.46		Recall - class 2	0.55	0.57	0.63	0.68
recall	0.33	0.33	0.46		Mean CV Accuracy	0.5545	0.4323	0.4505	0.4864
f1-score	0.38	0.37	0.46		Test Accurcay	0.4625	0.4529	0.4522	0.4604
support	198	198	198		better than others	4	1	0	2
class	1	1	1
precision	0.38	0.42	0.43
recall	0.41	0.46	0.38
f1-score	0.40	0.44	0.40
support	264	264	264
class	2	2	2
precision	0.47	0.52	0.48
recall	0.54	0.57	0.55
f1-score	0.50	0.54	0.51			Random Forest	GradientBoosting	GradientBoosting
support	224	224	224			Oversampling	nan	Oversampling
Confusion Matrix (Test)	[[65, 94, 39], [57, 109, 98], [22, 82, 120]]	[[66, 95, 37], [62, 121, 81], [28, 69, 127]]	[[91, 64, 43], [73, 100, 91], [33, 68, 123]]		Number of metrics with highest values	4	2	0
AUC	0.6174	0.6321	0.6368
Algorithm	DecisionTreeClassifier	DecisionTreeClassifier	DecisionTreeClassifier
Imbalance technique	nan	Weighted class	Oversampling
Type of classification	Multi	Multi	Multi
Mean CV Accuracy	0.3800	0.3820	0.5178
mean CV F1-Score	0.3820	0.3845	0.5145
Test Accuracy	0.4013	0.3880	0.4087
Test F1-Score	0.4025	0.3884	0.4065
class	0	0	0
precision	0.35	0.32	0.38
recall	0.36	0.30	0.40
f1-score	0.36	0.31	0.39
support	198	198	198
class	1	1	1
precision	0.41	0.39	0.40
recall	0.39	0.38	0.37
f1-score	0.40	0.38	0.38
support	264	264	264
class	2	2	2
precision	0.44	0.44	0.44
recall	0.45	0.49	0.45
f1-score	0.44	0.46	0.45
support	224	224	224
Confusion Matrix (Test)	[[72, 77, 49], [81, 104, 79], [54, 70, 100]]	[[59, 83, 56], [81, 99, 84], [44, 70, 110]]	[[80, 70, 48], [88, 98, 78], [44, 79, 101]]
AUC	0.5523	0.5405	0.5556
Algorithm	GradientBoosting	GradientBoosting	GradientBoosting
Imbalance technique	nan	Weighted class	Oversampling
Type of classification	Multi	Multi	Multi
Mean CV Accuracy	0.4505	0.4566	0.4864
mean CV F1-Score	0.4477	0.4293	0.4713
Test Accuracy	0.4522	0.4633	0.4604
Test F1-Score	0.4478	0.4362	0.4239
class	0	0	0
precision	0.49	0.44	0.44
recall	0.29	0.46	0.47
f1-score	0.36	0.45	0.46
support	198	198	198
class	1	1	1
precision	0.43	0.42	0.42
recall	0.44	0.27	0.22
F1-score	0.43	0.32	0.29
support	264	264	264
class	2	2	2
precision	0.47	0.47	0.47
recall	0.63	0.67	0.68
F1-score	0.54	0.55	0.55
support	224	224	224
Confusion Matrix (Test)	[[57, 88, 53], [45, 116, 103], [15, 68, 141]]	[[91, 49, 58], [87, 70, 107], [27, 48, 149]]	[[94, 41, 63], [92, 59, 113], [29, 42, 153]]
AUC	0.6319	0.6253	0.6306
Algorithm	XGBClassifier	XGBClassifier	XGBClassifier
Imbalance technique	nan	Weighted class	Oversampling
Type of classification	Multi	Multi	Multi
Mean CV Accuracy	0.4247	0.4413	0.5273
mean CV F1-Score	0.4277	0.4389	0.5226
Test Accuracy	0.4310	0.4404	0.3989
Test F1-Score	0.4330	0.4354	0.3875
class	0	0	0
precision	0.41	0.41	0.38
recall	0.33	0.41	0.37
f1-score	0.37	0.41	0.37
support	198	198	198
class	1	1	1
precision	0.42	0.39	0.35
recall	0.45	0.37	0.29
f1-score	0.43	0.38	0.32
support	264	264	264
class	2	2	2
precision	0.48	0.50	0.44
recall	0.52	0.54	0.54
f1-score	0.50	0.52	0.49
support	224	224	224
Confusion Matrix (Test)	[[65, 89, 44], [62, 118, 84], [31, 77, 116]]	[[81, 82, 35], [81, 97, 86], [35, 67, 122]]	[[73, 73, 52], [87, 76, 101], [34, 69, 121]]
AUC	0.6269	0.6204	0.5936
Algorithm	LogisticRegression	LogisticRegression	LogisticRegression
Imbalance technique	nan	Weighted class	Oversampling
Type of classification	Multi	Multi	Multi
Mean CV Accuracy	0.4520	0.4581	0.4738
mean CV F1-Score	0.4459	0.4311	0.4595
Test Accuracy	0.4298	0.4440	0.4375
Test F1-Score	0.4268	0.4188	0.4111
class	0	0	0
precision	0.40	0.42	0.40
recall	0.25	0.45	0.45
f1-score	0.31	0.43	0.43
support	198	198	198
class	1	1	1
precision	0.42	0.42	0.41
recall	0.44	0.26	0.25
F1-score	0.43	0.32	0.31
support	264	264	264
class	2	2	2
precision	0.47	0.45	0.45
recall	0.59	0.62	0.61
F1-score	0.52	0.52	0.52
support	224	224	224
Confusion Matrix (Test)	[[50, 96, 52], [48, 117, 99], [26, 65, 133]]	[[89, 52, 57], [83, 68, 113], [41, 43, 140]]	[[90, 50, 58], [89, 65, 110], [45, 42, 137]]
AUC	0.6252	0.6251	0.6220
Algorithm	MLPClassifier	MLPClassifier	MLPClassifier
Imbalance technique	nan	adoptive learning rate	Oversampling
Type of classification	Multi	Multi	Multi
Mean CV Accuracy	0.4172	0.4172	0.5136
mean CV F1-Score	0.4203	0.4203	0.5101
Test Accuracy	0.4255	0.4255	0.4060
Test F1-Score	0.4245	0.4245	0.3955
class	0	0	0
precision	0.42	0.42	0.38
recall	0.38	0.38	0.50
f1-score	0.40	0.40	0.43
support	198	198	198
class	1	1	1
precision	0.42	0.42	0.38
recall	0.40	0.40	0.33
f1-score	0.41	0.41	0.35
support	264	264	264
class	2	2	2
precision	0.44	0.44	0.44
recall	0.49	0.49	0.39
f1-score	0.47	0.47	0.41
support	224	224	224
Confusion Matrix (Test)	[[76, 78, 44], [63, 106, 95], [43, 71, 110]]	[[76, 78, 44], [63, 106, 95], [43, 71, 110]]	[[99, 67, 32], [97, 87, 80], [63, 74, 87]]
AUC	0.5848	0.5848	0.5780
