# Supplementary material for: Ability of clinical data to predict readmission in Child and Adolescent Mental Health Services
Source: PeerJ Comput Sci. 2024 Oct 18;10:e2367. doi: 10.7717/peerj-cs.2367 (PMC11622991; doi:10.7717/peerj-cs.2367)
Supplement: Supplemental Information 22 [file peerj-cs-10-2367-s022.xlsx]

## Sheet: Table S4
Comparing the distribution	Tillnextepisode_BinnaryBinId	Predicted_label	Predicted_label
		(Primary classifier)	(Classifier with weighted class)
Binary classes and Bins	0: 19250 1: 3426	0: 22676 1: 1	0: 12777 1: 9899
Multi classes and Bins	0: 1001 1: 1316 2: 1109	0: 3097 1: 329 2: 0	0: 981 1: 1308 2: 1137
