# Supplementary material for: Ability of clinical data to predict readmission in Child and Adolescent Mental Health Services
Source: PeerJ Comput Sci. 2024 Oct 18;10:e2367. doi: 10.7717/peerj-cs.2367 (PMC11622991; doi:10.7717/peerj-cs.2367)
Supplement: Supplemental Information 23 [file peerj-cs-10-2367-s023.xlsx]

## Sheet: Table S5
	Without Medication & Diagnosis			Includes Medication & Diagnosis as a set, includes all			With Unique Top 20 Medication & Diagnosis			With Unique Top 50 Medication & Diagnosis			With Unique Top 100 Medication & Diagnosis
Number of Cluster	Cluster Label & Number of Episodes	SI Score	CI Score	Cluster Label & Number of Episodes	SI Score	CI Score	Cluster Label & Number of Episodes	SI Score	CI Score	Cluster Label & Number of Episodes	SI Score	CI Score	Cluster Label & Number of Episodes	SI Score	CI Score
2	1 17737 0 4939	0.223	3479.06	1 17167 0 5509	0.291	6775.33	1 17943 0 4733	0.359	10994.9	1 18251 0 4425	0.367	12321.6	0 18270 1 4406	0.365	12754.8
3	0 16657 2 4710 1 1309	0.276	3689.25	2 16088 0 5288 1 1300	0.234	3616.87	0 16818 1 4522 2 1336	0.256	4473.64	2 17103 1 4235 0 1338	0.246	5081.84	2 17118 1 4219 0 1339	0.243	5298.24
4	3 8555 0 8117 1 4700 2 1304	0.249	4251.44	2 8348 0 7757 3 5278 1 1293	0.171	2350.99	2 8618 1 8469 3 4251 0 1338	0.114	3494.63	1 8715 3 8531 0 4091 2 1339	0.141	3984.3	1 8721 2 8540 0 4076 3 1339	0.097	3925.34
5	4 8551 3 8262 1 4553 2 1173 0 137	0.162	3745.57	3 8175 0 7757 4 3727 1 1727 2 1290	0.171	1707.52	0 8620 1 8476 4 4249 3 1194 2 137	0.118	2997.43	0 8714 1 8534 3 4092 4 1199 2 137	0.104	2930.87	1 8092 2 6850 3 4006 0 2412 4 1316	0.046	2738.64
6	2 7788 4 6751 0 4553 5 2294 1 1153 3 137	0.217	4415.24	0 8156 1 7759 2 3758 4 1720 3 1146 5 137	0.105	1362.86	2 8022 3 6694 5 2665 1 2388 4 1621 0 1286	0.071	2304.92	5 8089 4 6770 3 4088 2 2398 1 1194 0 137	0.068	2007.41	5 8091 0 6851 4 4007 1 2412 2 1178 3 137	0.074	2199.4
7	1 7786 0 6751 4 2884 3 2294 5 1675 2 1149 6 137	0.191	4119.03	5 7715 1 5965 6 3708 2 2290 4 1720 3 1141 0 137	0.105	1054.61	2 5973 5 4590 3 4355 0 4112 1 2370 6 1139 4 137	0.064	1647.35	0 7885 2 6581 3 2959 5 2394 6 1557 4 1163 1 137	0.093	1824.92	0 7926 6 6851 4 2678 2 2419 3 1519 1 1146 5 137	0.078	1894.48
8	7 5869 1 4462 0 4205 3 2891 4 2294 5 1675 2 1143 6 137	0.297	6002.19	6 7735 5 4680 1 3688 0 2216 4 1720 7 1373 3 1127 2 137	0.104	919.844	5 6026 2 4355 6 4103 4 3512 7 2326 1 1133 0 1084 3 137	0.054	1334.15	7 7885 4 6392 1 2691 0 2384 2 1563 5 1148 6 476 3 137	0.107	1891.21	0 7931 7 5388 4 2678 3 2406 6 1541 5 1455 2 1140 1 137	0.071	1609.58
